1  
2  
3  
4  
5  
6  
7  
8  
9  
10  
11  
12  
13  
14  
15  
16  
17  
18  
19  
20  
21  
22  
23  
24  
25  
26  
27  
28  
29  
30  
31  
32  
33  
34  
35

## PREDICTORS OF HIV TESTING AMONG YOUTH 15-24 YEARS IN URBAN ETHIOPIA, 2017-2018 ETHIOPIA POPULATION-BASED HIV IMPACT ASSESSMENT

Aderonke S. Ajiboye<sup>1\*</sup>, Frehywot Eshetu<sup>2</sup>, Sileshi Lulseged<sup>3</sup>, Yimam Getaneh<sup>4</sup>, Nadew Tademe<sup>3</sup>, Tsigereda Kifle<sup>4</sup>, Rachel Bray<sup>5</sup>, Hailegnaw Eshete<sup>3</sup>, Yohannes Demissie<sup>3</sup>, Clare A. Dykewicz<sup>1</sup>, David Hoos<sup>5</sup>, EPHIA Study Group

<sup>1</sup>Division of Global HIV and TB, Center for Global Health, CDC

<sup>2</sup>Division of Global HIV and TB, Center for Global Health, CDC Ethiopia

<sup>3</sup>ICAP at Columbia University, Ethiopia

<sup>4</sup>Ethiopia Public Health Institute, Federal Ministry of Health of Ethiopia

<sup>5</sup>ICAP at Columbia University, New York

\*Corresponding Author

Email: [aaajiboye@cdc.gov](mailto:aaajiboye@cdc.gov)

Journal: PLoS ONE

Description of Ethical Clearance: **Human Subjects Research, CDC engaged:** This study was reviewed and approved by the CDC Institutional Review Board

Disclaimer:

*The findings and conclusions in this publication are those of the author(s) and do not necessarily represent the official position of the funding agencies.*

*This publication has been supported by the President's Emergency Plan for AIDS Relief (PEPFAR) through the Centers for Disease Control and Prevention (CDC) under the terms of cooperative agreement award # 1U2GGH001226.*

## 36 ABSTRACT

37  
38 **Introduction:** Youth (adolescents and young adults) aged 15-24 years comprise approximately 22% of Ethiopia's  
39 total population and make up 0.73% of HIV cases in urban Ethiopia. However, only 63% of HIV-positive youth  
40 are aware of their HIV status. We described the HIV testing behaviors of youth 15-24 years and determined the  
41 characteristics of those who were most likely to be tested for HIV within the past year.

42 **Methods:** Using data from the 2017-2018 Ethiopia Population-based HIV Impact Assessment, we provide  
43 survey-weighted estimates and prevalence risk ratios for engagement in HIV testing in the 12 months preceding  
44 the survey. We model the likelihood of HIV testing one year or more before the survey compared to never testing,  
45 using a multinomial logistic regression model.

46 **Results:** Among HIV-negative and unaware HIV-positive youth 15-24 years old (N=7,508), 21.8% [95%  
47 Confidence Interval (CI): 20.4-23.3%] reported testing for HIV in the last 12 months. Female youth [Prevalence  
48 Ratio (PR)=1.6, 95% CI: 1.4-1.8], those aged 20-24 years (PR=2.6, 95% CI:2.3-2.9), and those ever married  
49 (PR=2.8, 95% CI: 2.5-3.1) were more likely to have tested for HIV within the last year. Adjusting for select  
50 demographic characteristics, sex with a non-spousal or non-live-in partner [Relative Risk (RR)=0.3, 95% CI:0.1-  
51 0.8] among males did not increase their likelihood to test for HIV in the prior 12 months. Female youth engaged  
52 in antenatal care (RR=3.0, 95% CI: 1.7-5.3) were more likely to test for HIV in the past year.

53 **Conclusion:** The Ethiopian HIV case finding strategy may consider approaches for reaching untested youth, with  
54 a specific focus on adolescent males. This is critical towards achieving the UNAIDS HIV testing goal of 95% of  
55 all individuals living with HIV aware of their status by 2030.

## 56 INTRODUCTION

57  
58 Since 1990, under-five child mortality in Eastern and Southern Africa has steadily decreased by 3.7%  
59 each year [1]. The reduction in child mortality over the last 30 years in sub-Saharan Africa has contributed to  
60 what is known today as the African 'youth bulge', with 60% of the total sub-Saharan African population under the  
61 age of 25 years [2]. The rapidly increasing young adult population across sub-Saharan Africa has introduced new  
62 challenges in the fight to end HIV/AIDS. Historically, perinatally infected children were assumed to not have  
63 survived past childhood. However, recent studies in Zimbabwe and South Africa have shown that an increasing  
64 number of undiagnosed adolescents are now presenting at primary care facilities with symptoms of long-term  
65 HIV infection [3] [4].

67 Many new cases of HIV infection are also occurring within the 15–24-year-old age group. As of 2019, 15–24-  
68 year-old sub-Saharan African youths make up 36% of all new HIV infections among adults 15 years and older  
69 [5]. In 2017 alone, an estimated 290,000 new HIV infections occurred among those 15-24 years in Eastern and  
70 Southern Africa with two-thirds of these infections among young women [2]. If not for the youth bulge, it is  
71 estimated that between 2010-2017, there would have been 340,000 fewer new cases of HIV among sub-Saharan  
72 African youth, aged 15-24 years [2]. As the youth population continues to grow across sub-Saharan Africa, the  
73 greatest challenge to reaching HIV epidemic control will be the identification of new and untreated cases of HIV.

74

75 In Ethiopia, Africa’s second most populous country, youths aged 15-24 years make up 22% of the nation’s total  
76 population [6]. In the urban and densely populated parts of the country, the prevalence of HIV is 4.2%, which is  
77 almost triple the national prevalence of 1.5% [6]. Little is known about how youth contribute to the national urban  
78 HIV epidemic in Ethiopia. The 2016 Ethiopia Demographic Health Survey assessed for knowledge of HIV  
79 transmission and prevention methods among youth. Survey results found that only 24% of women and 39% of  
80 men 15-24 years of age had a comprehensive knowledge of HIV prevention methods [7]. Prior to recent  
81 population-based estimates [8], little has been known of the actual burden of HIV in the younger age groups,  
82 specifically regarding overall HIV prevalence and the percentage of undiagnosed and untreated HIV infections.

83

84 The Ethiopia Population-based HIV Impact Assessment (EPHIA), conducted from 2017-2018, found that only  
85 63% of HIV-positive 15–24-year-olds were aware of their HIV status. Among those who were aware, 100% were  
86 on antiretroviral HIV treatment, and 78.6% of those on treatment had achieved HIV viral load suppression [8].  
87 Ethiopian HIV-positive youth are well below the first Joint United Nations Programme on HIV/AIDS (UNAIDS)  
88 recommended target of 90% awareness of HIV positive status [9]. The Ethiopia national HIV program has  
89 implemented several strategies to increase efforts to identify untreated cases of HIV. These strategies mainly  
90 employ provider-initiated case finding and social networking testing [10]. The services offered within these  
91 strategies, index case testing and partner notification, have historically targeted the married partners and  
92 biological children of HIV-positive individuals [10]. The current national HIV testing strategies may be missing  
93 many undiagnosed HIV-positive youths 15-24- years old in urban Ethiopia. This paper seeks to describe the HIV  
94 testing behaviors of Ethiopian youth 15-24 years, and to identify the demographic and behavioral characteristics  
95 of this age group, as well as the aspects of the healthcare system that facilitate the engagement of youth in HIV  
96 testing in urban Ethiopia.

97

## 98 **METHODS**

99 The Ethiopia Population-based HIV Impact Assessment (EPHIA) was a national, household-based survey  
100 conducted in urban Ethiopia from October 2017 to March 2018. As a cross-sectional survey, the primary  
101 objective was to estimate the national and sub-national proportion of HIV viral load suppression (<1000  
102 copies/mL) among HIV-positive adults 15-49 years of age. Secondly, the survey aimed to estimate the prevalence  
103 of HIV and the coverage of HIV prevention and treatment services among adolescents and adults aged 15-64  
104 years. We assessed HIV testing behaviors of persons aged 15-24 years and focused on those who were HIV-  
105 negative or unaware of their HIV-positive status. We aimed to identify factors that might inhibit youth's access to  
106 HIV testing, particularly among those at risk of acquiring HIV and those at risk of unknowingly transmitting the  
107 virus.

108

109

## 110 **Sampling design**

111 The EPHIA used a two-stage cluster sampling design [11] to select a representative sample of enumeration areas  
112 (EAs) and households across urban areas of Ethiopia. Urban was defined as any region, district, or capital where  
113 residents do not engage in agricultural practices as the primary source of income. The 2007 National Ethiopian  
114 Census served as the sampling frame for the selection of enumeration areas. The first stage of sampling included  
115 393 EAs selected randomly from all eleven regions of the country based on a probability proportional to regional  
116 population size. The second stage of sampling involved an average number of 30 households randomly selected  
117 per cluster, using an equal probability method, for a total of 11,810 households.

## 118 **Participant Eligibility and Data collection**

119 A household questionnaire was administered to selected households. Eligible household members were those  
120 between the ages of 0-64 years old, those who slept in the household the night before the survey, spoke one of six  
121 survey languages and were willing and able to provide written informed consent or assent. Non-de facto  
122 household members, those who did not sleep in the household the night before the survey, were not eligible for  
123 participation. The questionnaire assessed for the biobehavioral factors related to HIV infection, including  
124 sociodemographic factors, reproductive history, sexual activity, HIV testing and the utilization of HIV care and  
125 treatment services, and attitudes towards HIV disclosure. Data from household and individual interviews were  
126 collected using mobile tablets and were stored on a central server [12].

127

128 All eligible participants received home-based HIV testing and counseling (HBTC) following Ethiopia's rapid HIV  
129 diagnostic algorithm. Although participants self-reported their HIV status in the individual questionnaire, HIV  
130 status for the survey was defined by the result of the HIV rapid test. HIV rapid test results were returned to  
131 consenting participants at the household. Laboratory confirmation of seropositive samples was conducted using  
132 the Geenius HIV-1/2 supplemental assay. Self-reported awareness of HIV-positive status was confirmed by HIV-  
133 1 RNA and antiretroviral (ARV) drug testing [13].

134

135

## 136 **Variables**

137 We assessed the demographic, behavioral, and structural factors associated with HIV testing in the year preceding  
138 the survey. We generated a three-level outcome variable comparing: 1) those who self-report testing in the 12  
139 months preceding the survey, 2) those self-reporting testing more than 12 months since the survey, and 3) those  
140 who never tested. Those who reported ever testing for HIV and reported testing in the 12 months prior to the  
141 survey, regardless of whether they received their test results, were categorized as having tested for HIV in the last  
142 12 months. We categorized those reporting a last HIV test date as more than 12 months preceding the survey  
143 separately. Those who did not report ever testing for HIV were categorized as having never tested.

144

145 Age, marital status, education, employment, and urban area size are covariates in this analysis. Youth were  
146 disaggregated into two five-year age groups of 15-19 years and 20-24 years. For this analysis, adolescents are  
147 persons aged 15-19 years and young adults are persons aged 20-24 years. Small and large urban areas were  
148 determined by their population size. Small urban areas were those with less than 50,000 people and large urban  
149 areas were areas with 50,000 people or more. Individuals missing data due to a response of “don’t know” or  
150 refusal to answer the questions on marital status, education, and employment were categorized with those who  
151 answered negatively to the question (never married, no education, and not employed, respectively). Those missing  
152 a response were included in the sample to maintain the overall sample size and the power within the regression  
153 models. Of this sample, 0.7% of respondents are missing or did not disclose their marital status, 0.1% of  
154 respondents did not disclose their employment status, and 0.2% of respondents are missing or did not disclose  
155 their highest level of education.

156 The sexual risk behaviors included in this analysis were age at first sex, the presence of a non-spousal or non-live-  
157 in sex partner in the past 12 months, condom use at last sex in the past 12 months, and engagement in  
158 transactional sex. To evaluate the accessibility of HIV testing within the Ethiopian healthcare system, we included

159 the EPHIA variables for antenatal, tuberculosis, and sexually transmitted infection (STI) clinic attendance in our  
160 analysis.

161

## 162 **Data Analysis**

163 Survey weights were applied to the responses to the household interview, the individual participant interview, and  
164 the HIV biomarker survey data. Sampling weights allow for two-cluster survey data to be generalizable beyond  
165 the sample by accounting for sample selection probability and for the nonresponse of the households and  
166 individuals included in the original sample. We analyzed responses from survey participants ages 15-24 years  
167 who had complete questionnaire and HIV testing data, and thus used the biomarker weights. Additionally, data  
168 analysis was only conducted among HIV-negative and unaware HIV-positive individuals, with awareness of HIV  
169 status confirmed through self-reporting or confirmatory ARV drug testing. Individuals that were found to have  
170 ARVs in their blood were considered aware of their HIV status and excluded from the analysis.

171

172 We generated bivariate weighted percentages and prevalence ratios (PRs) of testing for HIV in the last 12 months  
173 by select demographic, behavioral, and healthcare covariates. We conducted significance testing ( $p < 0.05$ ) to  
174 determine if prevalence ratios for testing for HIV in the last 12 months significantly differed from 1, and  
175 generated p-values (Table 2). We generated two multinomial logistic regression models [14], separating male and  
176 female respondents to eliminate the bias of confounding by gender. In the multinomial model, we compared the  
177 likelihood for testing in the past 12 months and testing more than 12 months before the survey to the likelihood of  
178 never testing. The models were adjusted for age, marital status, and employment in the past 12 months. To assess  
179 sexual behavioral risk for HIV infection, the variable for ‘non-spousal sex partner in the past 12 months’ was  
180 included in the final model. Similarly, medical male circumcision and antenatal care attendance served as  
181 indicators for healthcare access within their respective male and female multivariate models. We conducted  
182 significance testing to determine if the adjusted relative risk ratios significantly differed from 1, using a p-value of  
183 less than 0.05. Stata statistical software version SE 15.0 was used to perform all statistical analysis. All weighted

184 estimates and 95% confidence intervals (CI) were calculated using jackknife replicate weights that account for  
185 sampling, nonresponse, and under coverage in the variance estimation.

186

## 187 **Ethics for Human Subjects Research**

188 This study was funded by the President's Emergency for Plan for AIDS Relief under the terms of cooperative  
189 agreement #1U2GGH001226. The study was approved by the Institutional Review Boards at the Ethiopia Public  
190 Health Institute, Columbia University Medical Center, Westat, and the Institutional Review Boards at The Centers  
191 for Disease Control and Prevention in Atlanta and Ethiopia. The survey was conducted by the Ethiopia Public  
192 Health Institute (EPHI), the Central Statistics Agency of Ethiopia, ICAP at Columbia University, Westat, and  
193 with technical assistance provided by the CDC. Participant consent was obtained through written informed  
194 consent or assent. Adult participants 18-64 years and emancipated minors 13-17 years provided informed consent  
195 prior to completing the individual interview and prior to survey blood collection. Adolescents 12-17 years were  
196 required to obtain parental permission and provide written assent to participate in the interview and blood  
197 collection.

198

## 199 **RESULTS**

200 A total of 7,547 youth aged 15-24 years were interviewed from selected households and completed HIV  
201 testing (Figure 1). Of these, 0.7% (n=62) tested HIV positive; 37.2% (n=23) of those positive were confirmed to  
202 be unaware of their HIV-positive status. Our analysis examines those 7,382 youth who tested negative for HIV or  
203 were found to be unaware of their HIV-positive status and had complete HIV testing information (Figure 2).  
204 Overall, 49.6% (95% CI: 49.4-49.7, n=3,805) of all respondents were 15-19 years old and 50.5% (95% CI: 50.3-  
205 50.6, n= 3,577) were 20-24 years old, and 49.8% (95% CI: 49.6-50.0) of respondents were male (Table 1).

206

## 207 **Sample Characteristics**



208 About a similar proportion of the youth participants resided in small and large urban areas (Table 1). Twenty-two  
209 percent (22.3%, 95% CI: 20.5-24.1) of all youth have ever married or lived with a partner as if married (Table 1).  
210 However, the proportion of female youth who have married was three times that of male youth. Among urban  
211 youth 15-24 years, 64% (95% CI: 61.8-66.2) report achieving secondary or post-secondary education as their  
212 highest level of education. More than two-thirds (69.4%, 95% CI: 67.5-71.3) of all youth were not employed or  
213 did not receive compensation for work in the 12 months preceding the survey (Table 1).  
214 Nearly forty percent (39.6%, 95% CI: 37.8-41.4) of all youth 15-24 years reported ever having sex. Of these,  
215 18.7% (95% CI: 16.5-21.0) of females and 13.4% (95% CI: 11.1-16.1) of males report sexual debut before the age  
216 of 15. Thirty-seven percent (36.8%, 95% CI: 33.5-40.3; n=682) of youth reported having at least one non-spousal  
217 or non-live-in sexual partner in the last year; but the rate was higher in males (58.1%, 95% CI: 52.4-63.5) versus  
218 females (23.0%, 95% CI: 20.2-25.9). Most (62.6%, 95% CI: 60.6-64.6) youth expressed that it is easy for them to  
219 access a condom; 72.8% (95% CI: 70.0-75.5) of male youth versus 52.5% (95% CI: 50.3-54.6) of female youth.  
220 For youth who reported having sex in the 12 months preceding the survey, 83.4% (95% CI: 80.9-85.7; n=1,751)  
221 reported that they did not use a condom at last sex. Proportionally more female than male youth reported not  
222 using a condom at last sex (92.2% (95% CI: 90.6-93.6) vs. 69.3% (95% CI: 63.4-74.7), respectively).  
223 Ninety-five percent (94.9, 95% CI: 92.9-96.3) of male youth report being circumcised; of these, 30.1% (95% CI:  
224 26.5-33.9) had a medical circumcision (circumcision performed by a physician or clinical officer) (Table 1).  
225 Among female youth who gave birth in the three years preceding the survey, 94.5% (95% CI: 89.8-97.1) report to  
226 have received antenatal care during their most recent pregnancy (Table 1).

227

## 228 **Prevalence of HIV Testing in the past 12 months**

229 Among HIV-negative and HIV-positive Ethiopian youth unaware of their HIV status, 51.4% (n=3,971) report ever  
230 being tested for HIV (Figure 1). Twenty-two percent (21.8%) of these youth reported to having an HIV test in the  
231 12 months preceding the survey and 27.5% tested for HIV more than a year before the survey (Figure 1).  
232 Proportionally more youth aged 20-24 than youth 15-19 years reported having tested in the last 12 months (31.4%  
233 (95% CI: 29.2-33.7) vs. 12.3% (95% CI: 10.9-13.8), respectively) (Table 2). Twenty-seven percent (26.8%, 95%

234 CI: 25.2-28.6) of female youth reported testing for HIV in the last 12 months, while only 16.8% (95% CI: 14.8-  
235 19.0) of men have tested within this same timeframe.

236 Forty-seven (47.6%, 95% CI: 42.5-52.8) percent of female youth who attended an ANC clinic in the last three  
237 years also received an HIV test in that year (Table 2). Only 1.2% (95% CI: 0.8-1.7) of all youth reported having  
238 received a prior STD diagnosis (Table 1); of these 54.3% (95% CI: 35.4-72.1) received an HIV test (Table 2). In  
239 addition, 40.5% (95% CI: 32.8-48.8) of those who have ever been to a TB clinic also received HIV testing in the  
240 last year (Table 2).

## 241 **Predictors of HIV Testing in Youth**

242 For all youth, age, gender, marital status, and recent employment were significant predictors of HIV testing in the  
243 12 months preceding the survey. Youth 20-24 years of age were more than twice as likely to have tested for HIV  
244 in the last 12 months than youth 15-19 years (PR=2.6, 95% CI: 2.3-2.9). Regardless of age, women were almost  
245 twice as likely to have tested in the last year in comparison to men (PR= 1.6, 95% CI: 1.4-1.8). Those ever  
246 married or have lived with a partner were three times as likely to have tested in the last 12 months (PR=2.8, 95%  
247 CI: 2.5-3.1). Employed youth were nearly twice as likely to have HIV tested in the past year than unemployed  
248 youth (PR=1.6, 95% CI: 1.4-1.8). For all youth, the likelihood of HIV testing in the last 12 months did not  
249 significantly increase by level of education (Table 2).

250 Youth who have been sexually active (PR=3.2, 95% CI:2.8-3.6), and those who received an STD diagnosis in the  
251 last year (PR= 1.5, 95% CI: 1.0-2.1) were significantly more likely to have tested for HIV in the last year than to  
252 have never tested (Table 2). Those reporting at least one non-spousal, non-live in sexual partner in the past 12  
253 months were significantly less likely to have tested for HIV in the past year, in comparison to those with all  
254 marital or live-in partners (PR=0.74, 95% CI: 0.6-0.9). Youth who report using a condom at last sex were  
255 significantly less likely to have tested for HIV in the last year (PR=0.80, 95% CI: 0.6-1.0).

256 The youth in this analysis were significantly more likely to test for HIV in the past 12 months if they had ever  
257 visited a TB clinic or received care for STI symptoms (Table 2). Males who had medical male circumcision were  
258 significantly less likely to have tested for HIV in the past year (PR=0.70, 95% CI:0.5-0.9).

259 Table 3 presents the multinomial logistic regression models for HIV testing by gender. Among males, controlling  
260 for variables of sexual behavioral risk and healthcare access, being older (20-24 years) was the only significant  
261 predictor for recent HIV testing likelihood. Young adult males (20-24 years) in comparison to adolescent males  
262 (15-19 years), had a three-fold likelihood of testing for HIV in the past year (RR=2.8, 95% CI:1.4-5.7) than never  
263 testing. Males who reported a non-spousal, non-live in sexual partner in the last year were significantly less likely  
264 to have tested for HIV in the last 12 months (RR=0.3, 95% CI:0.1-0.8). When controlling for other variables,  
265 marital status did not have a significant effect on the likelihood for receiving a recent HIV test among men in this  
266 age group (Table 3). For non-recent testing ( $\geq 12$  months before the survey), young adult males (20-24 years) were  
267 significantly more likely to have ever tested in comparison to adolescent males 15-19 years (RR=3.0, 95% CI:  
268 2.0-5.5). There was not a significant difference between men reporting that all their partners in the last 12 months  
269 were marital partners and men reporting no marital partners and their likelihood to have ever tested for HIV  
270 (RR=0.8, 95% CI:0.3-2.0).

271 Among female youth, recent HIV testing (<12 months) increased with older age (20-24 years old), having ever  
272 married or lived with a partner, and having at least secondary education (Table 3). Also, females who attended an  
273 antenatal clinic in the last three years were significantly more likely to have tested for HIV in the last year (Table  
274 3). When controlling for factors such as age or education level, female youth who reported a non-spousal, non-  
275 live-in sex partner in the past 12 months, were not significantly more likely to have HIV testing, either within the  
276 last year or more than one year before the survey (Table 3).

## 277 **DISCUSSION**

278 Among youth ages 15-24 in urban Ethiopia, the individual factors that predict an increased likelihood for  
279 testing for HIV in the last year is female gender, older age (20-24 years), and ever being married. Looking at  
280 sexual risk behaviors, 40% of all youth report ever having sex and 40% of whom report engaging in sex with a  
281 non-spousal, non-live-in partner in the last year. Youth reporting to have had a non-marital sex partner in the last  
282 year were less likely to have recently tested for HIV by a factor of 0.64, in comparison to those who report only  
283 marital sex partners. Screening for TB infection or a sexually transmitted disease each increases the likelihood for  
284 testing in the last year by two-fold. Male youth who received a medical circumcision were significantly less likely

285 to be HIV tested in the last 12 months compared to those who did not have a medical circumcision. When these  
286 factors were modelled together, older age (20-24 years), continues to be a significant factor in predicting current  
287 engagement in HIV testing for both male and female youth. Sexual risk behaviors are an important factor to  
288 consider in predicting recent testing behaviors among males; and marital status and healthcare access remain  
289 persistent predictors for female youths' access to current HIV testing.

290 Our findings are consistent with the Ethiopian Federal Ministry of Health HIV Counseling and Testing (HCT)  
291 Guidelines [10]. Women and those who have ever married are more likely to have tested for HIV in the past year,  
292 as national guidelines emphasize the promotion of HIV counseling and testing to couples and women. Couples are  
293 encouraged to test at 'pre-engagement, pre-marital, or pre-conception' stages, with partner notification services  
294 offered. While partner testing should be encouraged, marital status is not a significant predictor of HIV testing in  
295 the last year in male youth. Recent data from the Demographic Health Survey (DHS) shows that Ethiopian male  
296 youth are likely to sexually debut 2.5 years before entering marriage [7], with urban males marrying even later.  
297 As adolescent boys reach young adulthood, undiagnosed HIV infection may contribute to HIV transmission.

298 National guidelines also promote testing to women during pregnancy and at the time of labor [10]. Additionally,  
299 guidelines encourage the integration of HIV counseling and testing within other health services, including TB and  
300 STI screening. The age of sexual consent in Ethiopia is eighteen years and, according to the national guidelines,  
301 adolescents may consent to HIV counseling and testing services at the age of 15 without approval from a parent or  
302 guardian [10] [15]. Youth aged 13-15 years old who are sexually active (through the commercial sexual  
303 exploitation of minors or child marriage) are considered 'mature minors' and can provide informed consent  
304 without parental permission [10]. Within our sample, eight percent of female youth and five percent of male youth  
305 reported to have engaged in sex before the age of 15 (Table 1), well before the legal age of consent. It is possible  
306 that youth who have engaged in sexual activity before the legal age are less likely to seek consistent testing due to  
307 stigma and societal expectations.

308 The 2007 National Guidelines for HIV Counseling and Testing in Ethiopia encourages the availability of 'youth  
309 friendly services', but these services are not clearly defined or linked to an existing health program [10].  
310 Improving the comprehensive knowledge of HIV among youth, specifically among male youth, may be an  
311 effective strategy to increase HIV testing in this age group. An analysis of DHS data from 29 sub-Saharan African

312 countries found an association between comprehensive HIV education and HIV testing in men [17]. Countries  
313 like Rwanda have found that HIV education disseminated through newspaper, radio, and television media  
314 campaigns were effective at reaching males and youth [17]. In Zambia and South Africa, in communities that  
315 achieved 90% awareness of HIV status among female youth, the door-to-door distribution of home-based self-test  
316 kits in select communities, proved to be effective at increasing the update of HIV testing and awareness of HIV  
317 status among males 16-29 years [18]. In Malawi, where HIV prevalence in youth is relatively low in comparison  
318 to adults, an index-testing strategy to test the children of HIV-positive adults through home-based testing yielded  
319 a 94% uptake of HIV testing among children <15 years and youth 15-24 years [19].

320 The results of our analysis uniquely differ from much of previous research on adolescent and young adult HIV  
321 testing in Africa. In an analysis of DHS data from four sub-Saharan African countries, males and those ages 15-19  
322 years were less likely to have tested for HIV in comparison to their older, female counterparts [16]. Our inclusion  
323 of adolescent boys and young men, 15-24, highlight an additional demographic for which HIV testing services  
324 should be targeted. Additionally, our analysis examines the engagement of HIV testing within the last 12 months.  
325 Examining HIV testing with this temporal restriction allows for a more accurate evaluation of the reach of current  
326 HIV testing and counseling strategies.

327

## 328 **Limitations**

329

330 The implications of our analysis are limited by the nature in which the data were collected. As a household  
331 survey, HIV testing history was captured through self-report rather than from an electronic medical record. Our  
332 data is subject to recall bias as respondents may have forgotten if they have ever tested or misreported the date of  
333 their last HIV test. The data is also subject to social desirability bias. The age of sexual consent in Ethiopia is  
334 eighteen [14]. Youth younger than 18 years of age may not disclose their prior sexual activity or engagement in  
335 HIV testing services to avoid any cultural stigma associated with engaging in sex before the age of consent.  
336 Estimates for testing for HIV and sexual risk behavior are likely underreported as a result. Lastly, the inclusion of  
337 unemancipated minors (15-17 years) in our sample required that they be related to an eligible and consenting  
338 adult. Our findings may better characterize the HIV testing behaviors of emancipated minors, 15-17 years old.

339 Emancipation status was not included as a possible predictor of testing due to our sample including youth who are  
340 and are not of legal age.

341

## 342 **Conclusion**

343

344 In urban Ethiopia, age, gender, and marital status significantly predict the engagement of youth in recent HIV  
345 testing. These predictors show that adolescents, aged 15-19 years, and males are not being adequately reached  
346 within the national HIV counseling and testing strategy in urban Ethiopia. Adolescent girls have a high  
347 probability of obtaining testing services if pregnant, through the promotion of HIV testing services in antenatal  
348 care. Our findings show that adolescent males are likely to be left out of the existing Ethiopia's targeted HIV  
349 testing strategy.

350 Among 15-24 years old males who report recent sex, most report sex outside of a committed partnership and few  
351 report consistent use of HIV prevention methods. Efforts to increase comprehensive knowledge of HIV and  
352 expand access to HIV testing, through at-home, self-testing kits, have been proven to be effective at reaching  
353 adolescent males in national HIV testing efforts. Expanding current HIV testing efforts to include male youth  
354 friendly services is important for the future of HIV epidemic control in urban Ethiopia.

## 355 **ACKNOWLEDGEMENTS**

356

357 We extend our thanks to the survey investigators and contributors from the Federal Ministry of Health, EPHI,  
358 ICAP, Westat, and CDC for their leadership and coordination of the survey. We also thank and acknowledge the  
359 EPHIA study group, specifically the data collection staffs, the field teams, laboratory, and administrative staff for  
360 their hard work and dedication to complete the survey. We also thank all EPHIA study participants for their  
361 gracious participation.

## 362 **REFERENCES**

363

- 364 1. President's Emergency Plan for AIDs Relief (PEPFAR). 2019. Ethiopia Country Operational  
365 Plan (COP/ROP) 2019 Strategic Direction Summary. [https://www.state.gov/wp-](https://www.state.gov/wp-content/uploads/2019/09/Ethiopia_COP19-Strategic-Directional-Summary_public.pdf)  
366 [content/uploads/2019/09/Ethiopia\\_COP19-Strategic-Directional-Summary\\_public.pdf](https://www.state.gov/wp-content/uploads/2019/09/Ethiopia_COP19-Strategic-Directional-Summary_public.pdf)
- 367 2. Joint United Nations Programme on HIV/AIDs, The (UNAIDS). 2018. The Youth bulge and  
368 HIV. [https://www.unaids.org/sites/default/files/media\\_asset/the-youth-bulge-and-hiv\\_en.pdf](https://www.unaids.org/sites/default/files/media_asset/the-youth-bulge-and-hiv_en.pdf)

- 369 3. Ferrand RA, Munaiwa L, Matsekete J, Bandason T, Nathoo K, Ndhlovu CE, et al. Undiagnosed  
370 HIV infection among adolescents seeking primary health care in Zimbabwe. *Clinical infectious*  
371 *diseases: an official publication of the Infectious Diseases Society of America*. 1 Oct 2010.  
372 51(7): 844–851. doi:10.1086/656361
- 373 4. Ferrand, R. A., Corbett, E. L., Wood, R., Hargrove, J., Ndhlovu, C. E., Cowan, F. M., ...  
374 Williams, B. G. (2009). AIDS among older children and adolescents in Southern Africa:  
375 projecting the time course and magnitude of the epidemic. *AIDS (London, England)*, 23(15),  
376 2039–2046. doi:10.1097/QAD.0b013e32833016ce
- 377 5. Khalifa A, Stover J, Mahy M, Idele P, Porth T, Lwamba C. Demographic change and HIV  
378 epidemic projections to 2050 for adolescents and young people aged 15-24. 25 Mar 2019. *Global*  
379 *Health Action*, 12:1, doi: 10.1080/16549716.2019.1662685
- 380 6. United States Agency International Development (USAID). 2018. Ethiopia: Nutrition Profile.  
381 [https://www.usaid.gov/sites/default/files/documents/1864/Ethiopia-Nutrition-Profile-Mar2018-](https://www.usaid.gov/sites/default/files/documents/1864/Ethiopia-Nutrition-Profile-Mar2018-508.pdf)  
382 [508.pdf](https://www.usaid.gov/sites/default/files/documents/1864/Ethiopia-Nutrition-Profile-Mar2018-508.pdf)
- 383 7. Central Statistical Agency (CSA) [Ethiopia] and ICF International. 2016. Ethiopia Demographic  
384 and Health Survey 2016: HIV Report. Addis Ababa, Ethiopia, and Rockville, Maryland, USA.
- 385 8. Ethiopian Public Health Institute (EPHI). August 2020. Ethiopia Population-based HIV Impact  
386 Assessment (EPHIA) 2017-2018: Final Report. Addis Ababa: EPHI
- 387 9. Joint United Nations Programme on HIV/AIDS, The (UNAIDS). 2018. 90-90-90: AN  
388 AMBITIOUS TREATMENT TARGET TO HELP END THE AIDS EPIDEMIC.  
389 <https://www.unaids.org/en/resources/909090>
- 390 10. Federal HIV/AIDS Prevention and Control Office, Federal Ministry of Health. 2007. Guidelines  
391 for HIV counselling and testing in Ethiopia. [http://www.ilo.org/wcmsp5/groups/public/---](http://www.ilo.org/wcmsp5/groups/public/---ed_protect/---protrav/---ilo_aids/documents/legaldocument/wcms_125384.pdf)  
392 [ed\\_protect/---protrav/---ilo\\_aids/documents/legaldocument/wcms\\_125384.pdf](http://www.ilo.org/wcmsp5/groups/public/---ed_protect/---protrav/---ilo_aids/documents/legaldocument/wcms_125384.pdf)
- 393 11. Sachathep K, Radin E, Hladik W, et al. Population-based HIV Impact Assessments Survey  
394 Methods, Response, and Quality in Zimbabwe, Malawi, and Zambia. *JAIDS Journal of Acquired*  
395 *Immune Deficiency Syndromes*: August 1, 2021 - Volume 87 - Issue - p S6-S16 doi:  
396 10.1097/QAI.0000000000002710
- 397 12. Metz M, Smith R, Mitchell R, et al. Data Architecture to Support Real-Time Data Analytics for  
398 the Population-Based HIV Impact Assessments, *JAIDS Journal of Acquired Immune Deficiency*  
399 *Syndromes*: August 1, 2021 - Volume 87 - Issue - p S28-S35 doi:  
400 10.1097/QAI.0000000000002703
- 401 13. Patel H, Duong Y, Birhanu S, Dobbs T, et al. A Comprehensive Approach to Assuring Quality  
402 of Laboratory Testing in HIV Surveys: Lessons Learned from the Population-Based HIV Impact  
403 Assessment Project, *JAIDS Journal of Acquired Immune Deficiency Syndromes*: August 1, 2021  
404 - Volume 87 - Issue - p S17-S27 doi: 10.1097/QAI.0000000000002702
- 405 14. Heeringa, SG, West BT, Berglund, PA. Applied survey data analysis. 2<sup>nd</sup> ed. Chapman and  
406 Hall/CRC, 2017
- 407 15. Fox K, Ferguson J, Ajose W, et al. (2013). Adolescent consent to testing: a review of current  
408 policies and issues in sub-Saharan Africa. In: *HIV and Adolescents: Guidance for HIV Testing*  
409 *and Counselling and Care for Adolescents Living with HIV: Recommendations for a Public*  
410 *Health Approach and Considerations for Policy-Makers and Managers*. Geneva: World Health  
411 Organization; 2013. ANNEX 15. <https://www.ncbi.nlm.nih.gov/books/NBK217954/>

- 412 16. Asaolu, IO, Gunn, JK, Center, KE, Koss, MP, Iwelunmor, JI, & Ehiri, JE. Predictors of HIV  
413 Testing among Youth in Sub-Saharan Africa: A Cross-Sectional Study. 5 Oct 2016. PloS One,  
414 11(10), e0164052. <https://doi.org/10.1371/journal.pone.0164052>
- 415 17. Tetteh, J., Frimpong, J., Budu, E., Adu, C., Mohammed, A., Ahinkorah, B., & Seidu, A. (2021).  
416 Comprehensive HIV/AIDS knowledge and HIV testing among men in sub-Saharan Africa: A  
417 multilevel modelling. *Journal of Biosocial Science*, 1-16. doi:10.1017/S0021932021000560
- 418 18. Chama Mulubwa, Bernadette Hensen, Mwelwa M Phiri, et al. (2019). Community based  
419 distribution of oral HIV self-testing kits in Zambia: a cluster-randomised trial nested in four  
420 HPTN 071 (PopART) intervention. *The Lancet HIV*, [https://doi.org/10.1016/S2352-](https://doi.org/10.1016/S2352-3018(18)30258-3)  
421 [3018\(18\)30258-3](https://doi.org/10.1016/S2352-3018(18)30258-3)
- 422 19. Chikwari CD, Dringus S, Ferrand RA. Barriers to, and emerging strategies for, HIV testing  
423 among adolescents in sub-Saharan Africa. *Curr Opin HIV AIDS*. 2018 May;13(3):257-264. doi:  
424 [10.1097/COH.0000000000000452](https://doi.org/10.1097/COH.0000000000000452). PMID: 29401121.  
425  
426  
427  
428  
429  
430  
431  
432  
433  
434  
435
